# Supplementary material for: The associations among Mindfulness, Psychological Flexibility, Adverse Childhood Experiences, and Psychological Symptoms in young adulthood
Source: Research Square preprint supplement (doi:10.21203/rs.3.rs-8142530/v1), 2025-12-08
Supplement: Supplementary file 1 [file e83fa7627a4e5baa579fa69f.docx]

# Supplementary Materials

**Figure A**

*
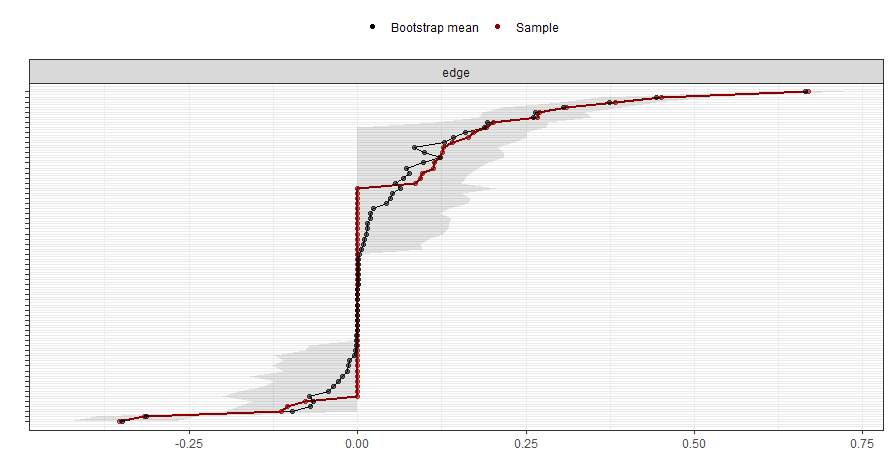
Network stability with non-parametric bootstrapping.*

**Figure B**

*
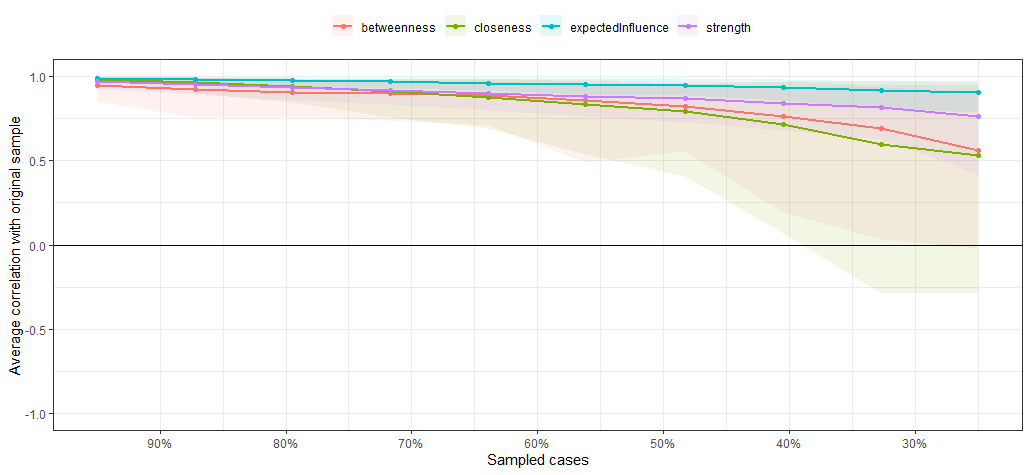
Centrality stability with case-drop bootstrapping.*

**Table A**

*Sample descriptives (Ν=516).*

|  | | N | Percentage |
| --- | --- | --- | --- |
| Gender | Male | 133 | 25.8% |
| Female | 381 | 73.8% |
| Other | 2 | 0.4% |
| Nationality | Cypriot | 470 | 91.1% |
| Greek | 42 | 8.1% |
| Other | 4 | 0.8% |
| Family status | Single | 202 | 39.1% |
|  | Married | 106 | 20.5% |
|  | In a relationship | 199 | 38.6% |
|  | Divorced | 9 | 1.7% |
| Work Status | Employed full-time | 353 | 68.4% |
| Student full-time | 130 | 25.2% |
| Unemployed | 29 | 5.6% |
| Employed and Student | 3 | 0.8% |
| Educational level | Primary | 20 | 3.9% |
|  | Secondary | 61 | 11.8% |
|  | Higher education (graduate) | 249 | 48.3% |
|  | Post-graduate | 1860 | 36.0% |
| Experience of traumatic events before 18yo | Yes | 245 | 47.5% |
| No | 271 | 52.5% |
| Lifetime mental health diagnosis | Yes | 130 | 25.2% |
| No | 386 | 74.8% |
| Lifetime treatment for mental health problems | Yes | 180 | 34.9% |
| No | 336 | 65.1% |
| Practice Mindfulness | Yes | 237 | 45.9% |
| No | 279 | 54.1% |
